# Supplementary material for: Enhancing the Am3+/Cm3+separation ability by weakening the binding affinity of N donor atoms: a comparative theoretical study of N, O combined extractants
Source: Royal Society of Chemistry journal article supplement (doi:10.1039/d0dt04266h), 2021-01-01
Supplement: d0dt04266h1.pdf [file d0dt04266h1.pdf]

Electronic Supplementary Information for

**Enhancing of Am<sup>3+</sup>/Cm<sup>3+</sup> separation ability by weakening binding affinity of N donor atom: A comparative theoretical study of N, O combined extractants**

Pin-Wen Huang,<sup>a</sup> Cong-Zhi Wang,<sup>\*b</sup> Qun-Yan Wu,<sup>b</sup> Jian-Hui Lan,<sup>b</sup> Zhi-Fang Chai,<sup>bc</sup> and Wei-Qun Shi<sup>\*b</sup>

<sup>a</sup>Zhejiang University of Water Resources and Electric Power, Hangzhou 310018, China

<sup>b</sup>Laboratory of Nuclear Energy Chemistry, Institute of High Energy Physics, Chinese Academy of Sciences, Beijing, China

<sup>c</sup>Engineering Laboratory of Advanced Energy Materials, Ningbo Institute of Industrial Technology, Chinese Academy of Sciences, Ningbo, Zhejiang, China

Corresponding Authors \*E-mail: shiwq@ihep.ac.cn, wangcongzhi@ihep.ac.cn

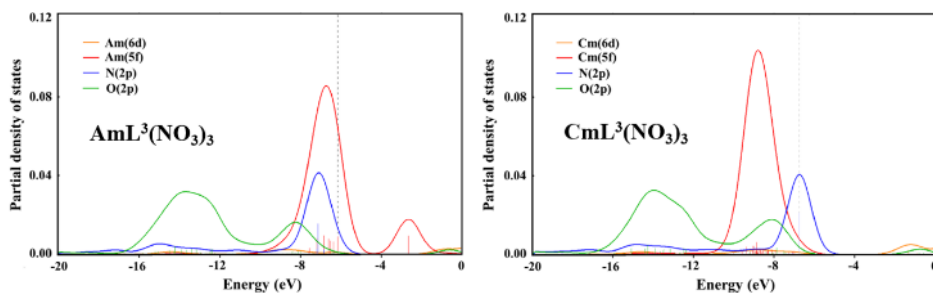

**Figure S1.** Partial density-of-state (PDOS) analysis of  $ML^3(NO_3)_3$ . The Am/Cm d, f and N/O p orbitals plotted as an orange, red, blue and dark green curve, respectively.

**Table S1.** The Wiberg bond indices (WBIs) of M-N and M-O bonds.<sup>a</sup>

| Complex               | M-N <sub>WBI</sub> | M-O <sub>WBI</sub> |
|-----------------------|--------------------|--------------------|
| $ML^1(NO_3)_3$        | 0.445/0.432        | 0.524/0.531        |
| $ML^2(NO_3)_3$        | 0.315/0.307        | 0.696/0.701        |
| $ML^3(NO_3)_3$        | 0.157/0.092        | 0.636/0.657        |
| $[M(L^1)_2NO_3]^{2+}$ | 0.504/0.476        | 0.680/0.669        |
| $[M(L^2)_2NO_3]^{2+}$ | 0.378/0.371        | 0.763/0.754        |

<sup>a</sup>./.. represents the results of M=Am and M=Cm, respectively.

**Table S2.** Changes of Gibbs free energies (kcal/mol) for extraction reactions of 1 : 1 and 1:2 metal to ligand ratios in cyclohexanone at the B3LYP/6-311G(d,p)/RECP level of theory.<sup>a</sup>

| Reaction                                                                                              | $\Delta G$      | $\Delta\Delta G$ |
|-------------------------------------------------------------------------------------------------------|-----------------|------------------|
| $[M(H_2O)_9]^{3+}_{aq} + L^1_{org} + 3NO_3^-_{aq} \rightarrow ML^1(NO_3)_3_{org} + 9H_2O_{aq}$        | -203.31/-197.43 | -5.88            |
| $[M(H_2O)_9]^{3+}_{aq} + L^2_{org} + 3NO_3^-_{aq} \rightarrow ML^2(NO_3)_3_{org} + 9H_2O_{aq}$        | -211.09/-205.06 | -6.03            |
| $[M(H_2O)_9]^{3+}_{aq} + L^3_{org} + 3NO_3^-_{aq} \rightarrow ML^3(NO_3)_3_{org} + 9H_2O_{aq}$        | -210.80/-203.18 | -7.63            |
| $[M(NO_3)(H_2O)_7]^{2+}_{aq} + L^1_{org} + 2NO_3^-_{aq} \rightarrow ML^1(NO_3)_3_{org} + 7H_2O_{aq}$  | -128.44/-125.19 | -3.26            |
| $[M(NO_3)(H_2O)_7]^{2+}_{aq} + L^2_{org} + 2NO_3^-_{aq} \rightarrow ML^2(NO_3)_3_{org} + 7H_2O_{aq}$  | -136.23/-132.82 | -3.41            |
| $[M(NO_3)(H_2O)_7]^{2+}_{aq} + L^3_{org} + 2NO_3^-_{aq} \rightarrow ML^3(NO_3)_3_{org} + 7H_2O_{aq}$  | -135.94/-130.93 | -5.01            |
| $[M(H_2O)_9]^{3+}_{aq} + 2L^1_{org} + NO_3^-_{aq} \rightarrow [M(L^1)_2NO_3]^{2+}_{org} + 9H_2O_{aq}$ | -67.84/-61.40   | -6.43            |
| $[M(H_2O)_9]^{3+}_{aq} + 2L^2_{org} + NO_3^-_{aq} \rightarrow [M(L^2)_2NO_3]^{2+}_{org} + 9H_2O_{aq}$ | -79.35/-72.77   | -6.59            |
| $[M(H_2O)_9]^{3+}_{aq} + 2L^3_{org} + NO_3^-_{aq} \rightarrow [M(L^3)_2NO_3]^{2+}_{org} + 9H_2O_{aq}$ | -93.15/-86.23   | -6.92            |
| $[M(NO_3)(H_2O)_7]^{2+}_{aq} + 2L^1_{org} \rightarrow [M(L^1)_2NO_3]^{2+}_{org} + 7H_2O_{aq}$         | 7.03/10.84      | -3.81            |

|                                                                                                       |               |       |
|-------------------------------------------------------------------------------------------------------|---------------|-------|
| $[M(NO_3)(H_2O)_7]^{2+}_{aq} + 2L^2_{,org} \rightarrow [M(L^2)_2NO_3]^{2+}_{,org} + 7H_2O_{aq}$       | -4.49/-0.52   | -3.97 |
| $[M(NO_3)(H_2O)_7]^{2+}_{aq} + 2L^{3'}_{,org} \rightarrow [M(L^{3'})_2NO_3]^{2+}_{,org} + 7H_2O_{aq}$ | -18.28/-13.98 | -4.30 |

<sup>a</sup> ./ .represents the results of M=Am and M=Cm, respectively.

**Table S3.** Changes of Gibbs free energies (kcal/mol) for extraction reactions of 1 : 1 and 1:2 metal to ligand ratios in nitrobenzene at the B3LYP/6-311+G(2df,p)/RECP level of theory.<sup>a</sup>

| Reactions                                                                                                   | $\Delta G$    | $\Delta\Delta G$ |
|-------------------------------------------------------------------------------------------------------------|---------------|------------------|
| $[M(H_2O)_9]^{3+}_{aq} + L^1_{,org} + 3NO_3^-_{,aq} \rightarrow ML^1(NO_3)_3_{,org} + 9H_2O_{aq}$           | -21.76/-15.62 | -6.14            |
| $[M(H_2O)_9]^{3+}_{aq} + L^2_{,org} + 3NO_3^-_{,aq} \rightarrow ML^2(NO_3)_3_{,org} + 9H_2O_{aq}$           | -30.49/-24.15 | -6.34            |
| $[M(H_2O)_9]^{3+}_{aq} + L^3_{,org} + 3NO_3^-_{,aq} \rightarrow ML^3(NO_3)_3_{,org} + 9H_2O_{aq}$           | -29.11/-22.46 | -6.65            |
| $[M(NO_3)(H_2O)_7]^{2+}_{aq} + L^1_{,org} + 2NO_3^-_{,aq} \rightarrow ML^1(NO_3)_3_{,org} + 7H_2O_{aq}$     | -11.35/-8.00  | -3.35            |
| $[M(NO_3)(H_2O)_7]^{2+}_{aq} + L^2_{,org} + 2NO_3^-_{,aq} \rightarrow ML^2(NO_3)_3_{,org} + 7H_2O_{aq}$     | -20.08/-16.53 | -3.55            |
| $[M(NO_3)(H_2O)_7]^{2+}_{aq} + L^3_{,org} + 2NO_3^-_{,aq} \rightarrow ML^3(NO_3)_3_{,org} + 7H_2O_{aq}$     | -18.70/-14.83 | -3.87            |
| $[M(H_2O)_9]^{3+}_{aq} + 2L^1_{,org} + NO_3^-_{,aq} \rightarrow [ML^1_2(NO_3)]^{2+}_{,org} + 9H_2O_{aq}$    | -27.51/-25.98 | -1.53            |
| $[M(H_2O)_9]^{3+}_{aq} + 2L^2_{,org} + NO_3^-_{,aq} \rightarrow [ML^2_2(NO_3)]^{2+}_{,org} + 9H_2O_{aq}$    | -44.40/-37.57 | -6.83            |
| $[M(H_2O)_9]^{3+}_{aq} + 2L^2_{,org} + NO_3^-_{,aq} \rightarrow [ML^{3'}_2(NO_3)]^{2+}_{,org} + 9H_2O_{aq}$ | -56.34/-49.32 | -7.02            |
| $[M(NO_3)(H_2O)_7]^{2+}_{aq} + 2L^1_{,org} \rightarrow [ML^1_2(NO_3)]^{2+}_{,org} + 7H_2O_{aq}$             | -17.10/-18.35 | 1.25             |
| $[M(NO_3)(H_2O)_7]^{2+}_{aq} + 2L^2_{,org} \rightarrow [ML^2_2(NO_3)]^{2+}_{,org} + 7H_2O_{aq}$             | -33.98/-29.94 | -4.04            |
| $[M(NO_3)(H_2O)_7]^{2+}_{aq} + 2L^{3'}_{,org} \rightarrow [ML^{3'}_2(NO_3)]^{2+}_{,org} + 7H_2O_{aq}$       | -45.93/-41.70 | -4.23            |

<sup>a</sup> ./ .represents the results of M=Am and M=Cm, respectively.

M. J. Frisch, G. W. Trucks, H. B. Schlegel, G. E. Scuseria, M. A. Robb, J. R. Cheeseman, G. Scalmani, V. Barone, B. Mennucci, G. A. Petersson, H. Nakatsuji, M. Caricato, X. Li, H. P. Hratchian, A. F. Izmaylov, J. Bloino, G. Zheng, J. L. Sonnenberg, M. Hada, M. Ehara, K. Toyota, R. Fukuda, J. Hasegawa, M. Ishida, T. Nakajima, Y. Honda, O. Kitao, H. Nakai, T. Vreven, J. A. Montgomery, Jr., J. E. Peralta, F. Ogliaro, M. Bearpark, J. J. Heyd, E. Brothers, K. N. Kudin, V. N. Staroverov, T. Keith, R. Kobayashi, J. Normand, K. Raghavachari, A. Rendell, J. C. Burant, S. S. Iyengar, J. Tomasi, M. Cossi, N. Rega, J. M. Millam, M. Klene, J. E. Knox, J. B. Cross, V. Bakken, C. Adamo, J. Jaramillo, R. Gomperts, R. E. Stratmann, O. Yazyev, A. J. Austin, R. Cammi, C. Pomelli, J. W. Ochterski, R. L. Martin, K. Morokuma, V. G. Zakrzewski, G. A. Voth, P. Salvador, J.

J. Dannenberg, S. Dapprich, A. D. Daniels, O. Farkas, J. B. Foresman, J. V. Ortiz, J. Cioslowski  
and D. J. Fox, Gaussian 09, Revision D.01, Gaussian, Inc., Wallingford CT, 2013.
